# Supplementary material
Source: Springer Nature journal article supplement (https://www.springermedizin.de/resource/supplementary/12889_2009_2019_MOESM3_ESM.pdf/9484318)
Supplement: MOESM3 [file 9484318]

Risk of having a heart attack or stroke within the next 5 years

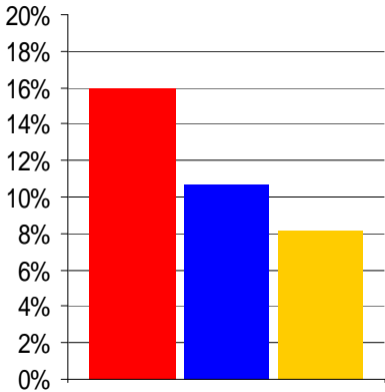

- Your risk
- Your risk if receiving treatment
- Average risk for someone of your age and sex
